# Supplementary material
Source: PubMed Central journal article supplement (PMC2650103)
Supplement: NIHMS91049-supplement-1_si_001.pdf [file NIHMS91049-supplement-1_si_001.pdf]

## **Supporting Information**

# Identification of Non-Nucleoside DNA Synthesis Inhibitors of Vaccinia Virus by High-Throughput Screening

*Mihai Ciustea<sup>a</sup>, Janice Elaine Y. Silverman<sup>a</sup>, Abigail M. Druck Shudofski<sup>b</sup> and Robert P. Ricciardi<sup>a,c\*</sup>*

<sup>a</sup> Department of Microbiology, School of Dental Medicine, University of Pennsylvania, Philadelphia, PA, USA

<sup>b</sup> Department of Microbiology, University of Pennsylvania School of Medicine, Philadelphia, PA, USA

<sup>c</sup> Abramson Cancer Center, University of Pennsylvania, Philadelphia, PA, USA

### **Table of Contents:**

| <b>Contents</b>                                                       | <b>Page Number</b> |
|-----------------------------------------------------------------------|--------------------|
| Table S1. Libraries screened and hit rates.                           | S2                 |
| Table S2. Summary of activities of 13 synthetic hit compounds.        | S3                 |
| Chart S1. Structures of the 13 synthetic hit compounds from Table S2. | S4                 |
| Table S3. Structures and activities of 64 synthetic hit compounds.    | S5                 |

**Table S1.** Screened libraries, number of compounds in each library and number of inhibitors of vaccinia virus DNA synthesis from each library identified in the primary HTS.

| Library Type        | Library Name                 | Compounds in Library | Strong Inhibition | Intermediate Inhibition | Weak Inhibition    |
|---------------------|------------------------------|----------------------|-------------------|-------------------------|--------------------|
|                     |                              |                      | >70% Inhibition   | 50%-70% Inhibition      | 30%-50% Inhibition |
| Known Bioactives    | Biomol ICCB Known Bioactives | 480                  | 6 (1.3%)          | 8 (1.7%)                | 11 (2.3%)          |
|                     | NINDS Custom Collection      | 1,040                | 15 (1.4%)         | 8 (0.8%)                | 10 (1.0%)          |
| Natural Extracts    | Starr Foundation Extracts 2  | 1,000                | 43 (4.3%)         | 41 (4.1%)               | 57 (5.7%)          |
|                     | ICBG Fungal Extracts 1       | 851                  | 59 (6.9%)         | 57 (6.7%)               | 54 (6.3%)          |
|                     | ICBG Fungal Extracts 2       | 460                  | 18 (3.9%)         | 30 (6.5%)               | 24 (5.2%)          |
| Synthetic Compounds | 1 ChemDiv 3                  | 16,544               | 21 (0.1%)         | 64 (0.4%)               | 89 (0.5%)          |
|                     | 2 MixCommercial 5            | 268                  | 0 (0.0%)          | 0 (0.0%)                | 1 (0.4%)           |
|                     | 3 Maybridge 4                | 4,576                | 2 (<0.1%)         | 9 (0.2%)                | 28 (0.6%)          |
|                     | 4 ActiMol TimTec 1           | 8,518                | 6 (0.1%)          | 19 (0.2%)               | 25 (0.3%)          |
|                     | 5 Bionet 2                   | 1,700                | 2 (0.1%)          | 2 (0.1%)                | 14 (0.8%)          |
|                     | 6 Enamine 1                  | 6,004                | 1 (<0.1%)         | 9 (0.1%)                | 19 (0.3%)          |
|                     | 7 I.F. Lab 1                 | 6,543                | 4 (0.1%)          | 17 (0.3%)               | 40 (0.6%)          |
|                     | 8 I.F. Lab 2                 | 292                  | 0 (0.0%)          | 4 (1.4%)                | 0 (0.0%)           |
|                     | 9 Maybridge 2                | 704                  | 1 (0.1%)          | 1 (0.1%)                | 5 (0.7%)           |
|                     | 10 MixCommercial 4           | 331                  | 0 (0.0%)          | 1 (0.3%)                | 3 (0.9%)           |
|                     | 11 Peakdale 2                | 352                  | 0 (0.0%)          | 1 (0.3%)                | 0 (0.0%)           |
| Total               |                              | 49,663               | 178 (0.4%)        | 271 (0.5%)              | 380 (0.8%)         |

**Table S2.** Summary of activities for 13 synthetic hit compounds that are trapped by DNA.

| compd <sup>a</sup> | DNA Synth<br>IC <sub>50</sub> (μM) | Cell Prot<br>EC <sub>50</sub> (μM) | Plaque Red<br>EC <sub>50</sub> (μM) | Tox 20 h<br>TC <sub>50</sub> (μM) | Tox 72 h<br>TC <sub>50</sub> (μM) | Tox 120 h<br>TC <sub>50</sub> (μM) | Selectivity<br>Index <sup>b</sup> | Trapped by<br>dsDNA |
|--------------------|------------------------------------|------------------------------------|-------------------------------------|-----------------------------------|-----------------------------------|------------------------------------|-----------------------------------|---------------------|
| <b>17</b>          | 65                                 | 18                                 | 40                                  | 192                               |                                   |                                    | 10.7                              | Yes                 |
| <b>18</b>          | 25                                 | 14                                 | 25                                  | 133                               |                                   |                                    | 9.5                               | Yes                 |
| <b>19</b>          | 42                                 | 23                                 | 25                                  | 100                               |                                   |                                    | 4.3                               | Yes                 |
| <b>20</b>          | 25                                 | 57                                 | 40                                  | >200                              |                                   | 12                                 | >3.5                              | Yes                 |
| <b>21</b>          | 18                                 | 57                                 | 25                                  | >200                              |                                   | 10                                 | >3.5                              | Yes                 |
| <b>22</b>          | 46                                 | 41                                 | 25                                  | 143                               |                                   |                                    | 3.5                               | Yes                 |
| <b>23</b>          | 25                                 | 87                                 | 100                                 | >200                              | 152                               | 60                                 | >2.3                              | Yes                 |
| <b>24</b>          | 30                                 | 40                                 | 25                                  | 87                                |                                   |                                    | 2.2                               | Yes                 |
| <b>25</b>          | 56                                 | 12                                 | 6                                   | 23                                |                                   |                                    | 1.9                               | Yes                 |
| <b>26</b>          | 39                                 | 98                                 | 100                                 | 135                               |                                   |                                    | 1.4                               | Yes                 |
| <b>27</b>          | 25                                 | 23                                 | 10                                  | 29                                |                                   |                                    | 1.3                               | Yes                 |
| <b>28</b>          | 708                                | 193                                | 100                                 | >200                              | 35                                |                                    | >1                                | Yes                 |
| <b>29</b>          | 5.6                                | 25                                 | 10                                  | 20                                |                                   |                                    | 0.8                               | Yes                 |
| <b>CDV</b>         |                                    | 132                                | 50                                  | >500                              | >500                              | 300                                | >3.8                              | No                  |

<sup>a</sup> Refer to Chart S1 for the structures of compounds **17** to **29**. <sup>b</sup> The Selectivity Index was obtained as the ratio between TC<sub>50</sub> in the 20 h cytotoxicity assay and EC<sub>50</sub> in the 20 h cell protection assay.

**Chart S1.** Structures of the 13 synthetic hit compounds whose activities are shown in Table S2.

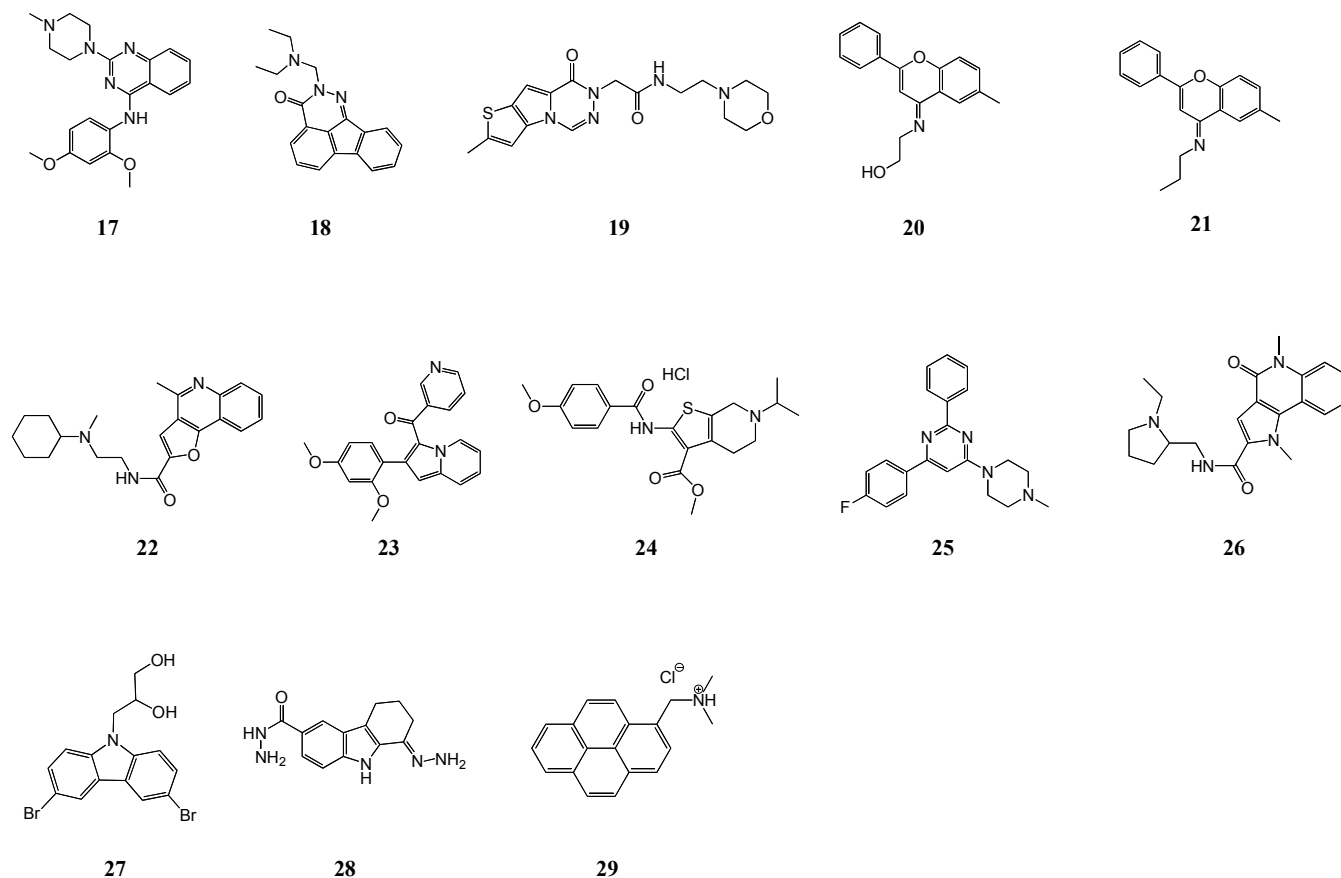

Compounds **17** (706769-72-4), **18** (664972-89-8), **20** (914071-96-8), **21** (913525-45-8), **22** (902627-18-3), **26** (902561-11-9), **28** (68339-98-0) belong to ChemDiv 3 library; compound **27** (173157-92-1) belongs to Maybridge 4 library; compounds **23** (327978-52-9), **29** (94256-44-7) belong to Enamine 1 library; compound **24** (524679-67-2) belongs to I.F. Lab 1 library; compound **19** (902915-02-0) belongs to Maybridge 2 library; compound **25** (881194-03-2) belongs to MixCommercial 4 library.

**Table S3.** Structures and follow-up study results of 45 synthetic compound inhibitors identified in the HTS.

| Library <sup>a</sup> | CAS Registry Number <sup>b</sup> | Compound Structure                                                                  | DNA Synthesis IC <sub>50</sub> (μM) | Plaque Reduction EC <sub>50</sub> (μM) | Toxicity 20 h TC <sub>50</sub> (μM) |
|----------------------|----------------------------------|-------------------------------------------------------------------------------------|-------------------------------------|----------------------------------------|-------------------------------------|
| 1                    | 864840-81-3                      | 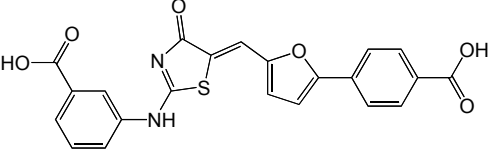   | 30                                  |                                        | >200                                |
| 1                    | 900319-37-1                      |    | 36                                  |                                        | >200                                |
| 4                    | 329691-77-2                      |  | 41                                  |                                        | >200                                |
| 4                    | 122-25-8                         |  | 51                                  |                                        | >200                                |
| 1                    | 823823-44-5                      |  | 75                                  |                                        | >200                                |
| 1                    | 112338-04-2                      |  | 86                                  |                                        | >200                                |
| 1                    | 683267-38-1                      |  | 95                                  |                                        | >200                                |



|   |             |  |    |     |      |
|---|-------------|--|----|-----|------|
| 1 | 332382-71-5 |  | 13 | 50  | 164  |
| 1 | 317326-06-0 |  | 14 | 50  | >200 |
| 1 | 860348-43-2 |  | 15 | 200 | >200 |
| 4 | 329213-15-2 |  | 16 | 40  | 90   |
| 1 | 901748-23-0 |  | 19 |     | 75   |
| 1 | 92555-63-0  |  | 21 | 50  | 49   |
| 1 | 899390-65-9 |  | 24 | 25  | 79   |
| 1 | 113657-49-1 |  | 24 | 75  | >200 |

|   |             |                                                                                     |    |     |      |
|---|-------------|-------------------------------------------------------------------------------------|----|-----|------|
| 1 | 886-77-1    | 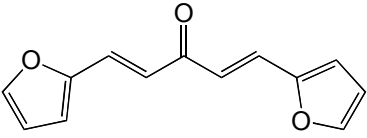   | 25 | 75  | >200 |
| 1 | 902600-80-0 |    | 25 | 50  | 147  |
| 1 | 31386-24-0  |    | 26 | 75  | >200 |
| 1 | 172038-68-5 |    | 28 | 30  | 72   |
| 1 | 913526-66-6 |   | 29 | 100 | >200 |
| 3 | 883044-26-6 |  | 29 | 100 | >200 |
| 1 | 913526-79-1 |  | 32 | 50  | 172  |
| 1 | 890809-88-8 |  | 37 | 5.0 | 3.9  |
| 1 | 901014-60-6 |  | 46 | 75  | >200 |



|   |              |                                                                                     |     |     |      |
|---|--------------|-------------------------------------------------------------------------------------|-----|-----|------|
| 1 | 891882-35-2  | 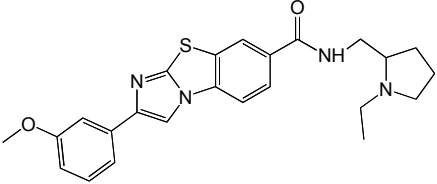   | 47  | 50  | 75   |
| 4 | 33289-49-5   |    | 63  | 100 | >200 |
| 6 | 479664-71-6  |    | 71  | 75  | 35   |
| 1 | 1008981-46-1 |    | 73  | 200 | >200 |
| 1 | 515867-15-9  |   | 89  | 75  | >200 |
| 1 | 957287-11-5  |  | 100 | 100 | >200 |
| 4 | 329057-10-5  |  | 112 | 40  | 82   |
| 1 | 127040-12-4  |  | 114 | 10  | 26   |
| 1 | 7489-66-9    |  | 115 | 100 | >200 |

|   |             |                                                                                    |     |     |      |
|---|-------------|------------------------------------------------------------------------------------|-----|-----|------|
| 1 | 361158-00-1 | 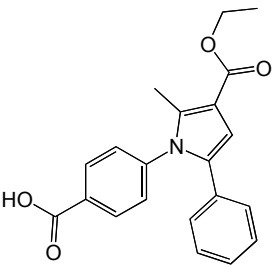  | 120 | 100 | >200 |
| 1 | 346643-31-0 |   | 143 | 50  | >200 |
| 1 | 346643-69-4 |   | 160 | 12  | 72   |
| 1 | 780810-55-1 |  | 250 | 150 | >200 |

<sup>a</sup> The synthetic compounds belong to the following libraries: ChemDiv 3 (library 1); Maybridge 4 (library 3); ActiMol TimTec (library 4); Enamine 1 (library 6); I.F. Lab 1 (library 7); and Maybridge 2 (library 9). <sup>b</sup> CAS (Chemical Abstracts Service) Registry Numbers are unique identifiers for chemical substances.
